# Supplementary material for: Hydrodeoxygenation of gamma-valerolactone on transition metal phosphide catalysts
Source: Royal Society of Chemistry journal article supplement (doi:10.1039/c6cy02252a), 2016-12-14
Supplement: c6cy02252a1.pdf [file c6cy02252a1.pdf]

# Hydrodeoxygenation of gamma-valerolactone on transition metal phosphide catalysts

Gwang-Nam Yun, Atsushi Takagaki, Ryuji Kikuchi, S. Ted Oyama

## Supplemental Information

$$\frac{-r'_a \rho_b R n}{k_c C_{Ab}}$$

If  $\frac{-r'_a \rho_b R n}{k_c C_{Ab}} < 0.15$ , then external mass transfer effects can be neglected.

**Table S1-1.** Parameters in the Mears criterion

|                                       |                                                            |         |
|---------------------------------------|------------------------------------------------------------|---------|
| R                                     | Catalyst particle radius / cm                              | 0.09    |
| n                                     | reaction order                                             | 1       |
| $\rho_b$ (Ni <sub>2</sub> P, CoP, Pd) | bulk density of catalyst bed, g/cm <sup>3</sup>            | 6.E-03  |
| $\rho_b$ (MoP, WP)                    | bulk density of catalyst bed, g/cm <sup>3</sup>            | 8.E-03  |
| $C_{Ab}$                              | bulk gas concentration of A at 300 °C, mol/cm <sup>3</sup> | 4.2E-07 |
| $k_c$                                 | mass transfer coefficient, cm/s                            | 102     |

**Table S1-2.** Observed reaction rates and calculated Mears criterion

|                 | Ni <sub>2</sub> P                                           | CoP      | MoP      | WP       | Pd       |
|-----------------|-------------------------------------------------------------|----------|----------|----------|----------|
| Temperature /°C | Observed reaction rate /mol g <sup>-1</sup> s <sup>-1</sup> |          |          |          |          |
| 250             | 2.06E-06                                                    | 3.98E-07 | 3.43E-07 | 3.15E-08 | 4.72E-07 |
| 275             | 4.58E-06                                                    | 9.13E-07 | 4.60E-07 | 7.02E-08 | 7.04E-07 |
| 300             | 8.80E-06                                                    | 2.08E-06 | 8.40E-07 | 1.53E-07 | 1.14E-06 |
| 325             | 1.12E-05                                                    | 3.92E-06 | 1.44E-06 | 3.00E-07 | 1.99E-06 |
| 350             | 1.14E-05                                                    | 6.73E-06 | 2.58E-06 | 5.64E-07 | 3.07E-06 |
| Temperature /°C | Mears criterion                                             |          |          |          |          |
| 250             | 2.37E-05                                                    | 4.58E-06 | 5.26E-06 | 4.83E-07 | 5.43E-06 |
| 275             | 5.52E-05                                                    | 1.10E-05 | 7.40E-06 | 1.13E-06 | 8.49E-06 |
| 300             | 1.11E-04                                                    | 2.63E-05 | 1.41E-05 | 2.58E-06 | 1.44E-05 |
| 325             | 1.47E-04                                                    | 5.16E-05 | 2.53E-05 | 5.26E-06 | 2.62E-05 |
| 350             | 1.57E-04                                                    | 9.23E-05 | 4.72E-05 | 1.03E-05 | 4.20E-05 |
